# Supplementary material
Source: PubMed Central journal article supplement (PMC3257922)
Supplement: supp_79.11.4578_IAI5586-11_SF1.pdf [file supp_79.11.4578_IAI5586-11_SF1.pdf]

## CCL20

```
350   AAACGTGTGGCTTTTCTGGAATGGAATTGGACATAGCCCAAGAACAGAAAGAACCTTGCTGGGGTTGGAGGTTTCACTTGC
430   ACATCATGGAGGGTTTAGTGCTTATCTAATTTGTGCCTCACTGGACTTGTCCAATTAATGAAGTTGATTCATATTGCATC
510   ATAGTTTGCTTTGTTTAAGCATCACATTAAAGTTAACTGTATTTTATGTTATTTAAGTTAGCTGTAGGTTTCTGTGTTAG
590   CTATTTAATACTAATTTCCATAAGCTATTTGGTTTAGTGCAAAGTATAAAATTATATTTGGGGGGGAATAAGATTATA
670   TGGACTTCTTGCAGCAACAAGCTATTTTTAAAAAAGCTATTTAATTTAATTTGTTTATATTGTTTGTCTCCTAA
750   ATTGTTGTAATTGCATTATAAAATAAGAAAAATATTAATAAGACAAATATT
```

## CXCL5

```
464   TTAAGAGAAATGAGCACGCATGGAAAAGTTTCCAGTCTTCAGCAGAGAAGTTTCTGGAGGTCTCTGAACCCAGGGAAG
544   ACAAGAAGGAAAGATTTTGTGTTGTTTGTATTTGTTTTCCAGTAGTTAGCTTTCTCTCGGATTCCTCACTTTGAA
624   GAGTGTGAGGAAAACCTATGTTGCCGCTTAAGCTTTCAGCTCAGCTAATGAAGTGTTAGCATAGTACCTCTGCTATTT
704   GCTGTTATTTTATCTGCTATGCTATTGAAAGTTTGGCAATTGACTATAGTGTGAGCCAGGAATCACTGGCTGTTAATCTT
784   TCAAAGTGTCTTGAATTGTAGGTGACTATTATTTTCCAAGAAATATTCCTTAAGATATTAAGTGAAGGCTGTGGATT
864   TAAATGTGGAATGATGTTTCATAAGAATTCTGTTGATGGAATACACTGTTATCTTCACTTTTAAAGAAATAGGAAATA
944   TTTAATGTTTCTGGGGAATATGTTAGAGAATTCCTTACTCTTGATTGTGGGATACTATTTAATTTCACTTTTGA
1024  AAGCTGAGTGTTCACACCTTATCTATGTAGAATATATTTCTTATTCAGAATTTCTAAAAGTTTAAAGTTCTATGAGGTC
1104  TAATATCTTATCTTCTATAATTTTAGACATTCTTATCTTTTTAGTATGGCAAAGTCCATCACTTTTAAACTTT
1184  GATTTTATATGCTATTTAAGTATTTATTAGGAGTACCATAATTCGGTAGCTAAATATATATTTTAGATAGATGAA
1264  GAAGCTAGAAAACAGGCAAATTCCTGACTGCTAGTTTATATAGAAATGTATCTTTTTAGTTTTTAAAGTAAAGGCAAAC
1344  TAACAATGACTTGTACTCTGAAAGTTTGGAAAGTATTCAAACAATTTGAATATAATTTATATCACTTTTAAACTTT
1424  ATATAGCGACATCCTCGAGGCCCTAGCATTCTCCTTGGATAGGGGACCAGAGAGAGCTTGGAAATGTTAAAAACAAAACA
1504  AAACAAAAAAAACAAAGGAGAAGTTGTCCAAGGGATGTCAATTTTTTATCCCTCTGTATGGGTTAGATTTTCCAAAATCA
1584  TAATTTGAAGAAGGCCAGCACTTATGTTAGTAATATAATTATATAAAGGTGGCCACGCTGGGGCAAGTCCCTCCCA
1664  CTCACAGCTTTGGCCCTTTTACAGAGTAGAACCTGGGTTAGAGGATTGCAGAAGACGAGCGGGAGCGGGAGGGCAGGG
1744  AAGATGCCGTGCGGGTTTTAGCACAGTTCATTTCACTGGGATTTGAAGCATTCTGTCTGAATGTAAAGCCTGTTCTA
1824  GTCCTGGTGGGACACACTGGGGTTGGGGTGGGGGAAGATGCGGTAATGAAACCGTTAGTCAGTGTGCTTAATATCC
1904  TTGATAATGCTGTAAAGTTTATTTTTACAAATATTTCTGTTAAGCTATTTCACTTTGTTGGAAATCCTTCCCTTTTA
1984  AAGAGAAAATGTGACACTTGTGAAAAGGCTTGTAGGAAAGCTCCTCCCTTTTTTTCTTTAAACCTTTAAATGACAAACCT
2064  AGGTAATTAATGGTTGTGAATTTCTATTTTGCCTTGTTTTTAATGAACATTTGTCTTTCAGAATAGGATTCTGTGATAA
2144  TATTTAATGGCAAAAACAAAACATAATTTGTGCAATTAACAAAGCTACTGCAAGAAAATAAAAACATTTCTTGGTAAA
2224  AACGTATGTTATATATATATATATATATATATATATATATATATATATATATATATATATATATATATATATATATAT
2304  TGTGTATCTTTAAAGGTTTGTACCATTTGTTATGAGTAATTACATATATATATATATATATATATATATATATATATAT
2384  TTTTACTATGTGTCTCATTGGTTCATAGTCTTTATTTTGTCTTTGAAATAACATTTAAAGATTTCTAAACTTC
```

**Figure S1:** Location of ARE in the 3'UTR of CCL20 and CXCL5 as determined by "ARE site"

[\[http://rna.tbi.univie.ac.at/AREsite\]](http://rna.tbi.univie.ac.at/AREsite), Gruber, A.R, J. Fallmann, F. Kratochvill, P.

Kovarik, and H. L. Hofacker. 2011. AREsite: a database for the comprehensive investigation of AU-rich elements Nucleic Acids Res. **39** (Database issue):D66-9]
